# Supplementary figures and images for: Sustainment of Integrated Care in Addiction Treatment Settings: Primary Outcomes From a Cluster-Randomized Controlled Trial
Source: Atypon-hosted journal article supplement (doi:10.1176/appi.ps.202000293), 2021-08-04

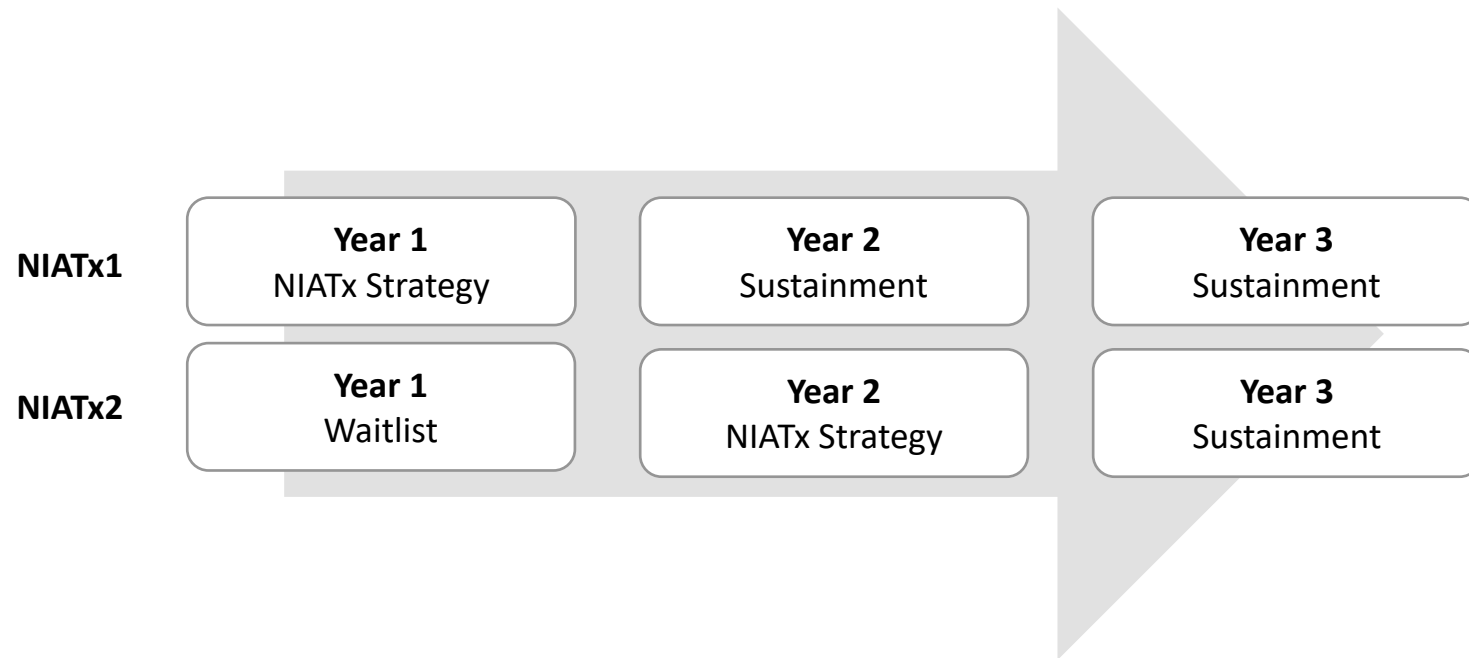

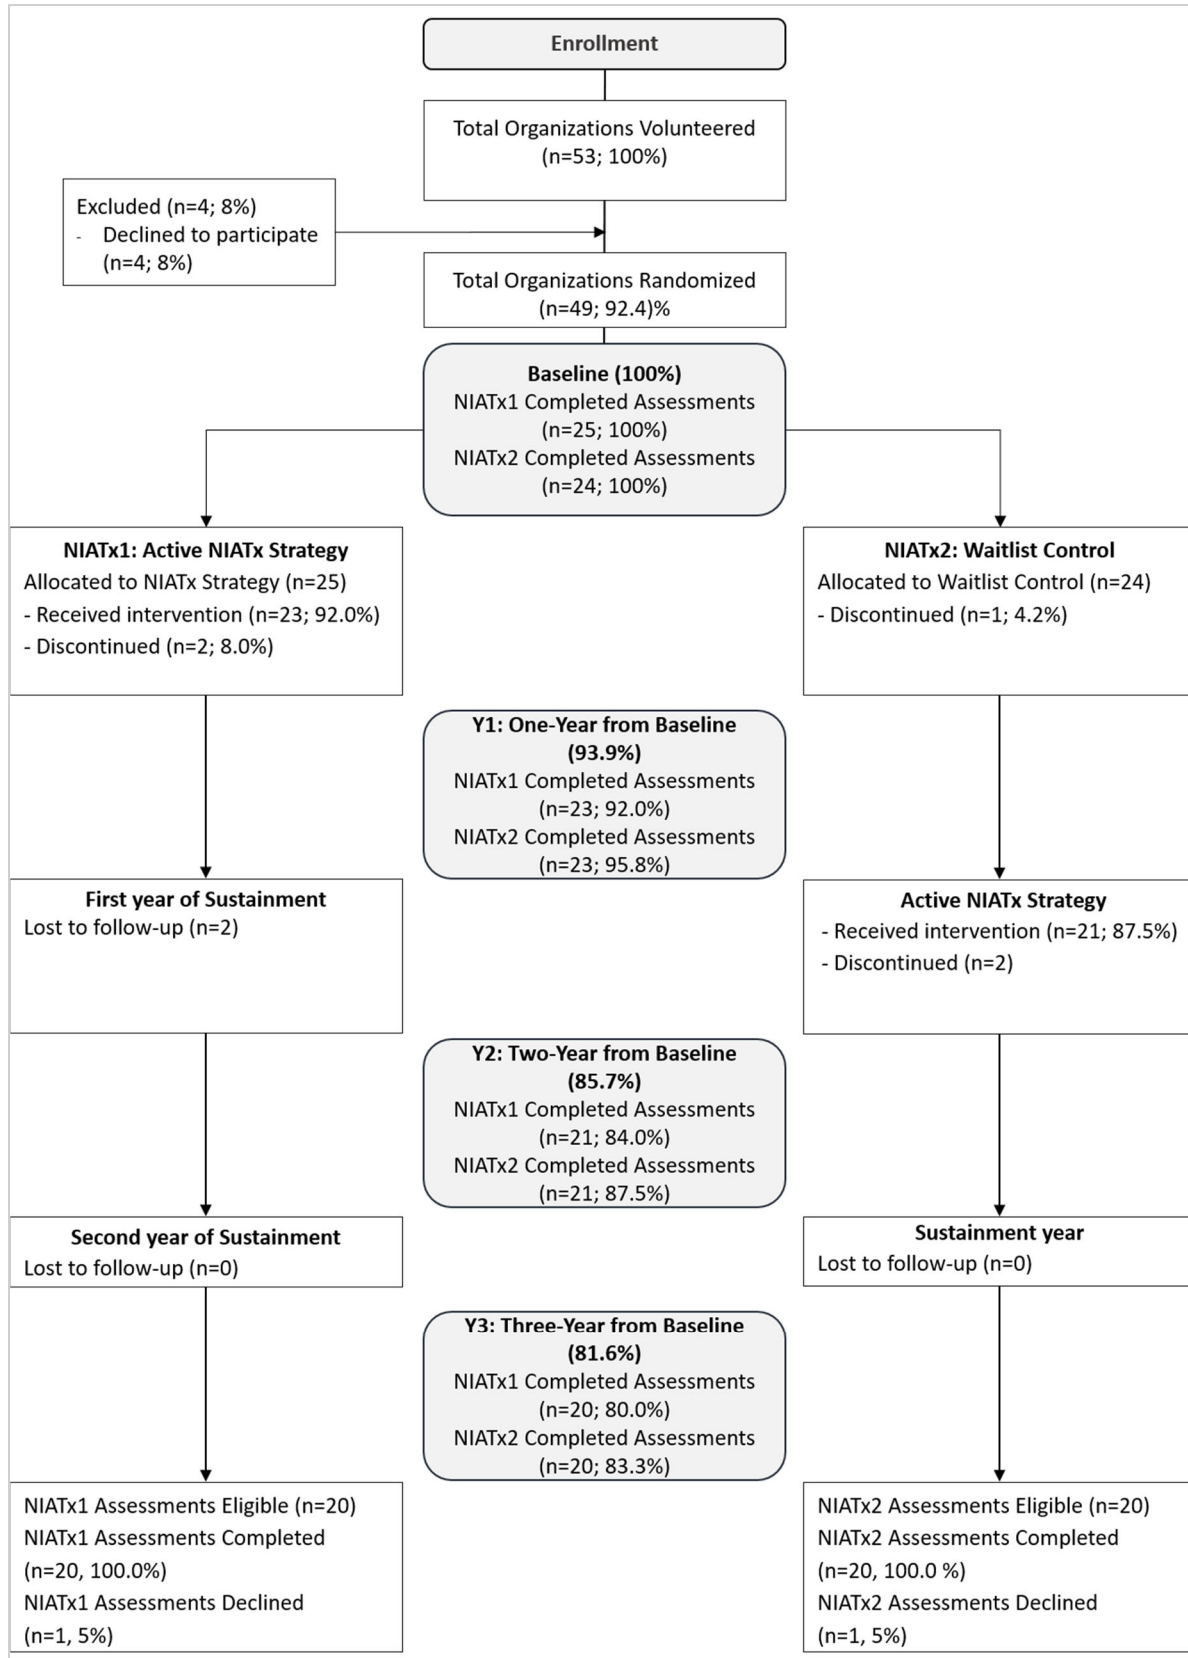

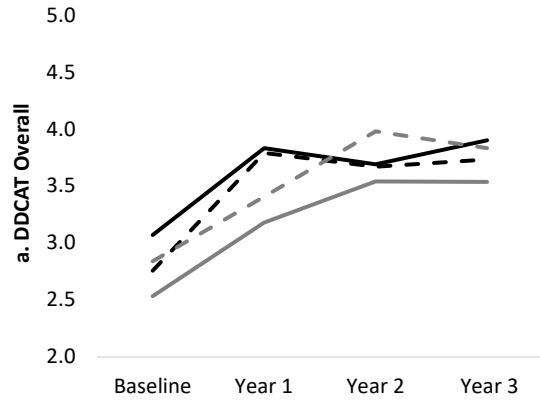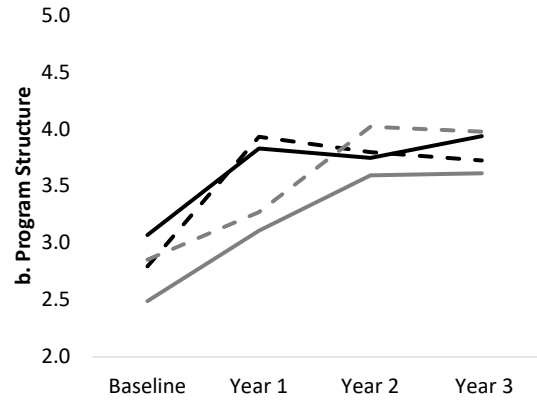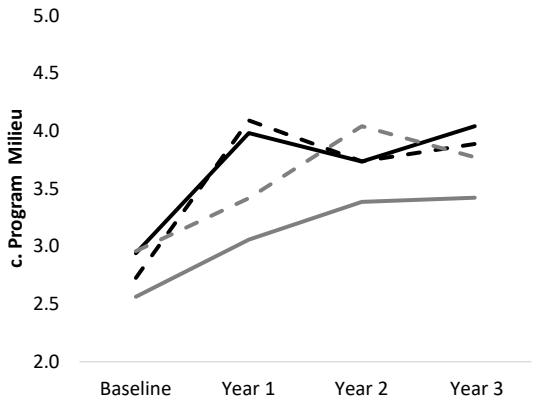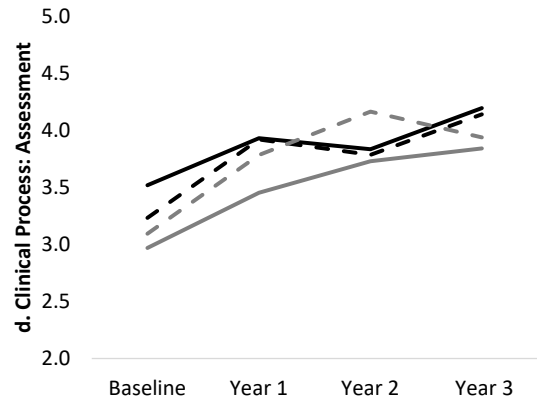

NIATx 1  
ITT (n=25)  
NIATx 2  
ITT (n=24)  
NIATx1 PP  
(n=11)  
NIATx2 PP  
(n=12)

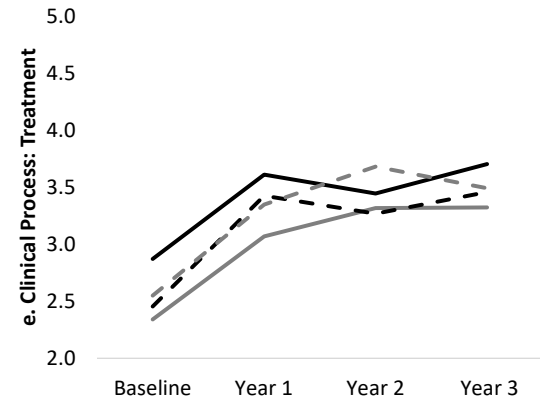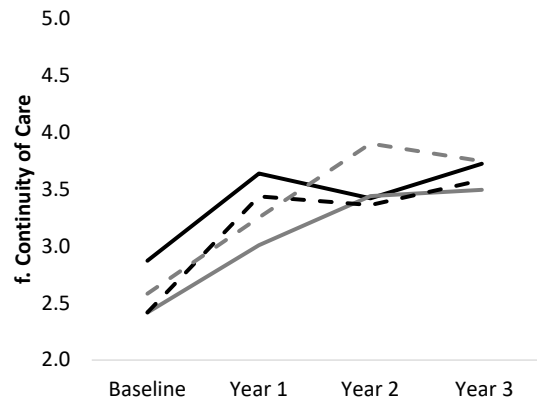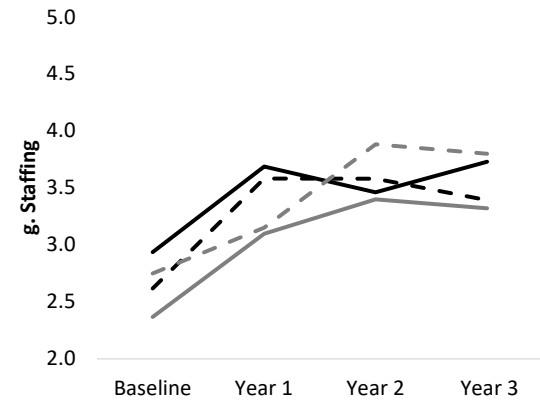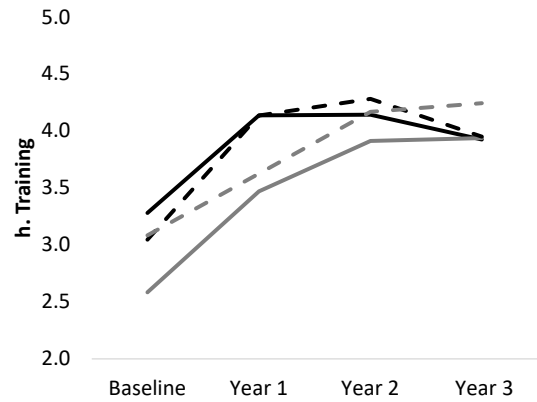

Supplement: appi.ps.202000293.ds001.pdf [file appi.ps.202000293.ds001.pdf]
